# Supplementary material for: Thermoresponsive dendritic oligoethylene glycols
Source: Royal Society of Chemistry journal article supplement (doi:10.1039/d2cp01286c), 2022-01-01
Supplement: d2cp01286c1.pdf [file d2cp01286c1.pdf]

Supplementary Information

Thermoresponsive Dendritic Oligoethylene Glycols

Gang Xu, Jiaying Zhang, Mengyuan Qi, Xiacong Zhang, Wen Li\* and Afang Zhang

International Joint Laboratory of Biomimetic & Smart Polymers, School of Materials Science and Engineering, Shanghai University, 333 Nanchen Road, 200444, China.

\*E-mail: wli@shu.edu.cn

Table of Contents

**Fig. S1** Plots of transmittance vs temperature for aqueous solutions of **Et<sup>3</sup>-M** (A), **Et<sup>4</sup>-M** (B), **Et<sup>6</sup>-M** (C), **Et<sup>3</sup>-OMe** (D), **Et<sup>4</sup>-OMe** (E), **Et<sup>6</sup>-OMe** (F), **Me<sup>3</sup>-M** and **Me<sup>3</sup>-OMe** (G, sample concentration 20 mg/mL). Heating and cooling rate = 0.2 °C · min<sup>-1</sup>. Heating: solid line; cooling: dot line. .... **2**

**Fig. S2** Thermally-induced aggregation monitored with NMR spectroscopy in D<sub>2</sub>O: Temperature-varied <sup>1</sup>H NMR spectra of **Et<sup>4</sup>-M** (A); <sup>1</sup>H-<sup>1</sup>H COSY spectra of **Et<sup>4</sup>-M** at 25 °C (below *T<sub>cp</sub>*) (B) and 36 °C (above *T<sub>cp</sub>*) (C). *T<sub>cp</sub>* = 31.4 °C. Sample concentration 2.0 wt%. .... **3**

**Fig. S3** Thermally-induced aggregation monitored with NMR spectroscopy in D<sub>2</sub>O: Temperature-varied <sup>1</sup>H NMR spectra of **Et<sup>6</sup>-M** (A); <sup>1</sup>H-<sup>1</sup>H COSY spectra of **Et<sup>6</sup>-M** at 25 °C (below *T<sub>cp</sub>*) (B) and 50 °C (above *T<sub>cp</sub>*) (C). *T<sub>cp</sub>* = 41.7 °C. Sample concentration 2.0 wt%. .... **4**

**Fig. S4** Thermally-induced aggregation monitored with NMR spectroscopy in D<sub>2</sub>O: Temperature-varied <sup>1</sup>H NMR spectra of **Et<sup>3</sup>-OMe** (A); <sup>1</sup>H-<sup>1</sup>H COSY spectra of **Et<sup>3</sup>-OMe** at 25 °C (below *T<sub>cp</sub>*) (B) and 60 °C (above *T<sub>cp</sub>*) (C). *T<sub>cp</sub>* = 55.8 °C. Sample concentration = 2.0 wt%. .... **5**

**Fig. S5** Thermally-induced aggregation monitored with NMR spectroscopy in D<sub>2</sub>O: Temperature-varied <sup>1</sup>H NMR spectra of **Et<sup>4</sup>-OMe** (A); <sup>1</sup>H-<sup>1</sup>H COSY spectra of **Et<sup>4</sup>-OMe** at 25 °C (below *T<sub>cp</sub>*) (B) and 44 °C (above *T<sub>cp</sub>*) (C). *T<sub>cp</sub>* = 41.9 °C. Sample concentration 2.0 wt%. . **6**

**Fig. S6** Thermally-induced aggregation monitored with NMR spectroscopy in D<sub>2</sub>O: Temperature-varied <sup>1</sup>H NMR spectra of **Et<sup>6</sup>-OMe** (A); <sup>1</sup>H-<sup>1</sup>H COSY spectra of **Et<sup>6</sup>-OMe** at 25 °C (below *T<sub>cp</sub>*) (B) and 60 °C (above *T<sub>cp</sub>*) (C). *T<sub>cp</sub>* = 53.8 °C. Sample concentration 2.0 wt%. . **7**

**Fig. S7** Optical photographs of aqueous solutions of the dendritic esters below (A-C) and above (D-F) their *T<sub>cp</sub>*s. All images have the same scale bar of 20 μm. Sample concentration 2.0 wt%. .... **8**

**Fig. S8** Emission spectra of pyrene aqueous solutions (1×10<sup>-6</sup> M) in the presence of dendritic macromonomers (0.25 wt%) **Et<sup>3</sup>-M** (A), **Et<sup>4</sup>-M** (B), and **Et<sup>6</sup>-M** (C) at different temperatures. λ<sub>ex</sub> = 333 nm. .... **8**

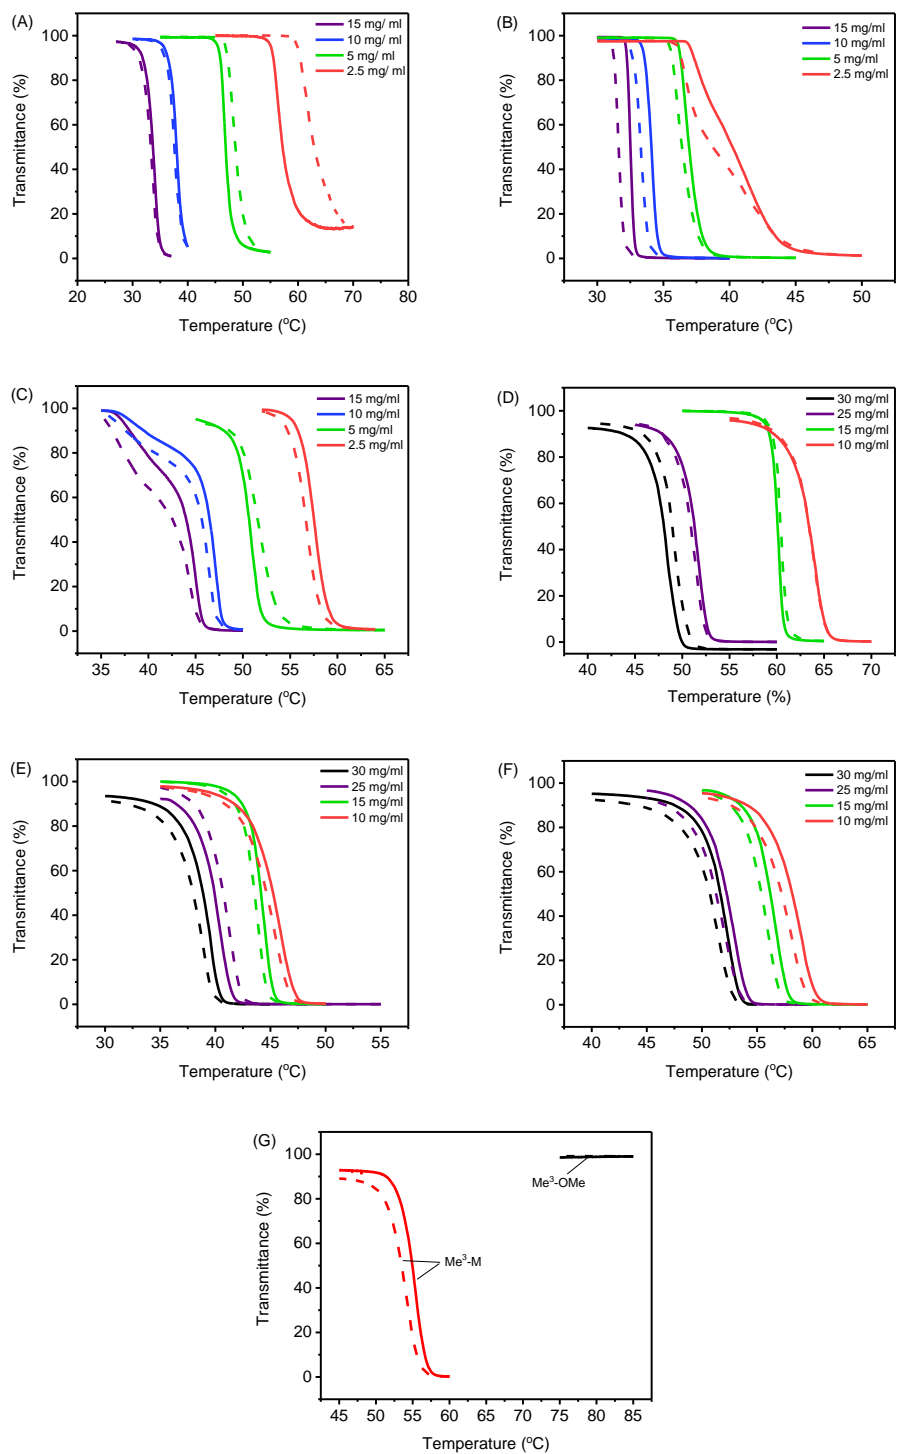

**Fig. S1** Plots of transmittance vs temperature for aqueous solutions of **Et<sup>3</sup>-M** (A), **Et<sup>4</sup>-M** (B), **Et<sup>6</sup>-M** (C), **Et<sup>3</sup>-OMe** (D), **Et<sup>4</sup>-OMe** (E), **Et<sup>6</sup>-OMe** (F), **Me<sup>3</sup>-M** and **Me<sup>3</sup>-OMe** (G, sample concentration 20 mg/mL). Heating and cooling rate = 0.2 °C · min<sup>-1</sup>. Heating: solid line; cooling: dot line.

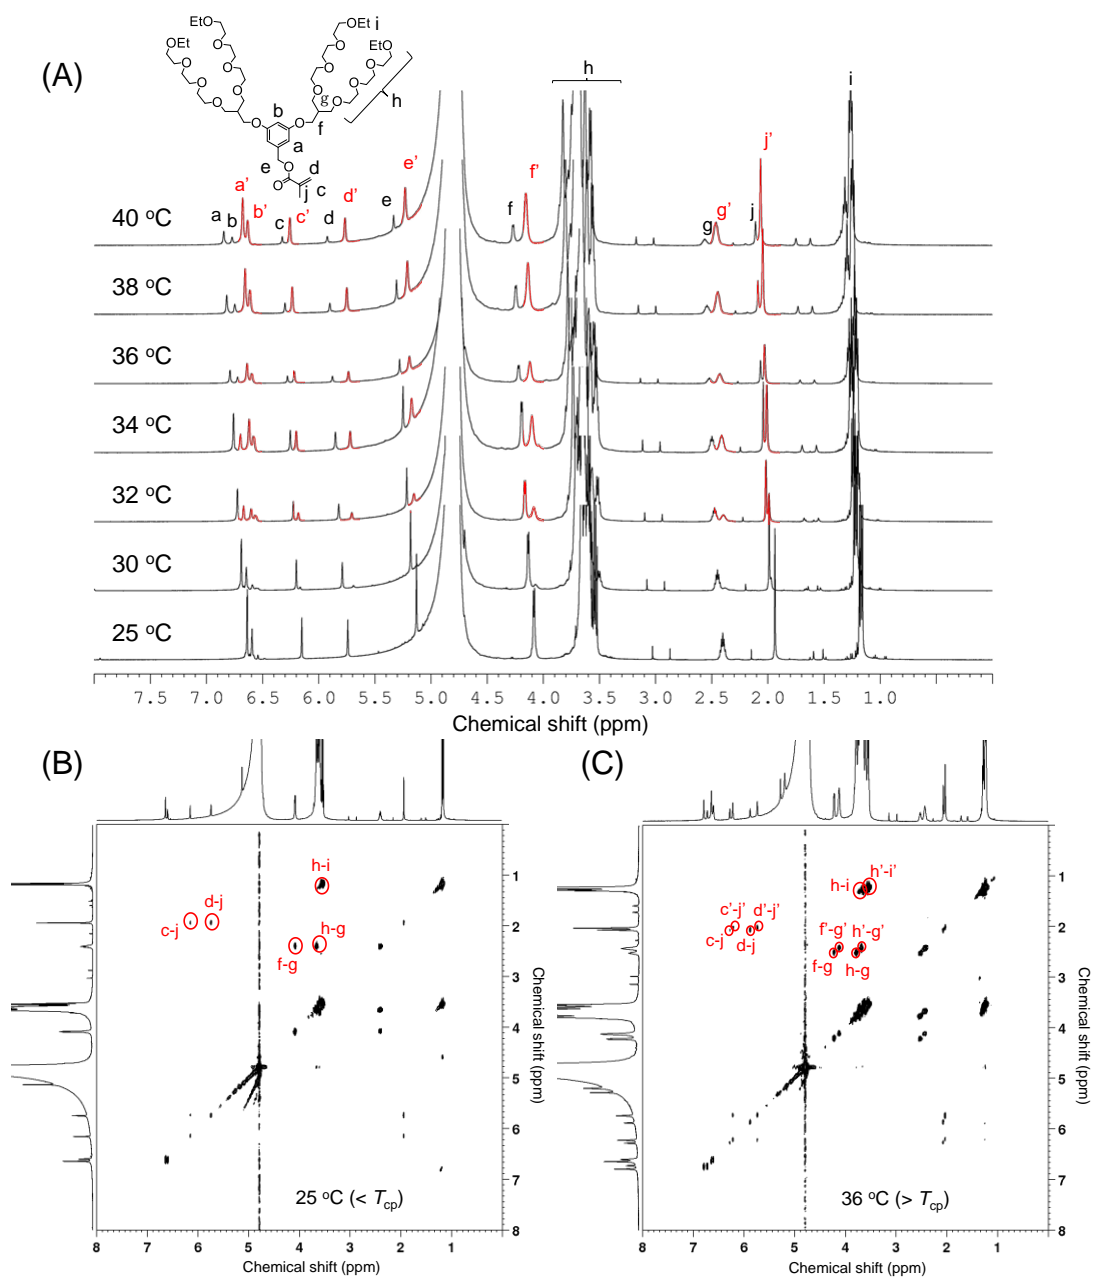

**Fig. S2** Thermally-induced aggregation monitored with NMR spectroscopy in D<sub>2</sub>O: Temperature-varied NMR spectra of **Et<sup>4</sup>-M** (A); <sup>1</sup>H-<sup>1</sup>H COSY spectra of **Et<sup>4</sup>-M** at 25 °C (below T<sub>cp</sub>) (B) and 36 °C (above T<sub>cp</sub>) (C). T<sub>cp</sub> = 31.4 °C. Sample concentration 2.0 wt%.

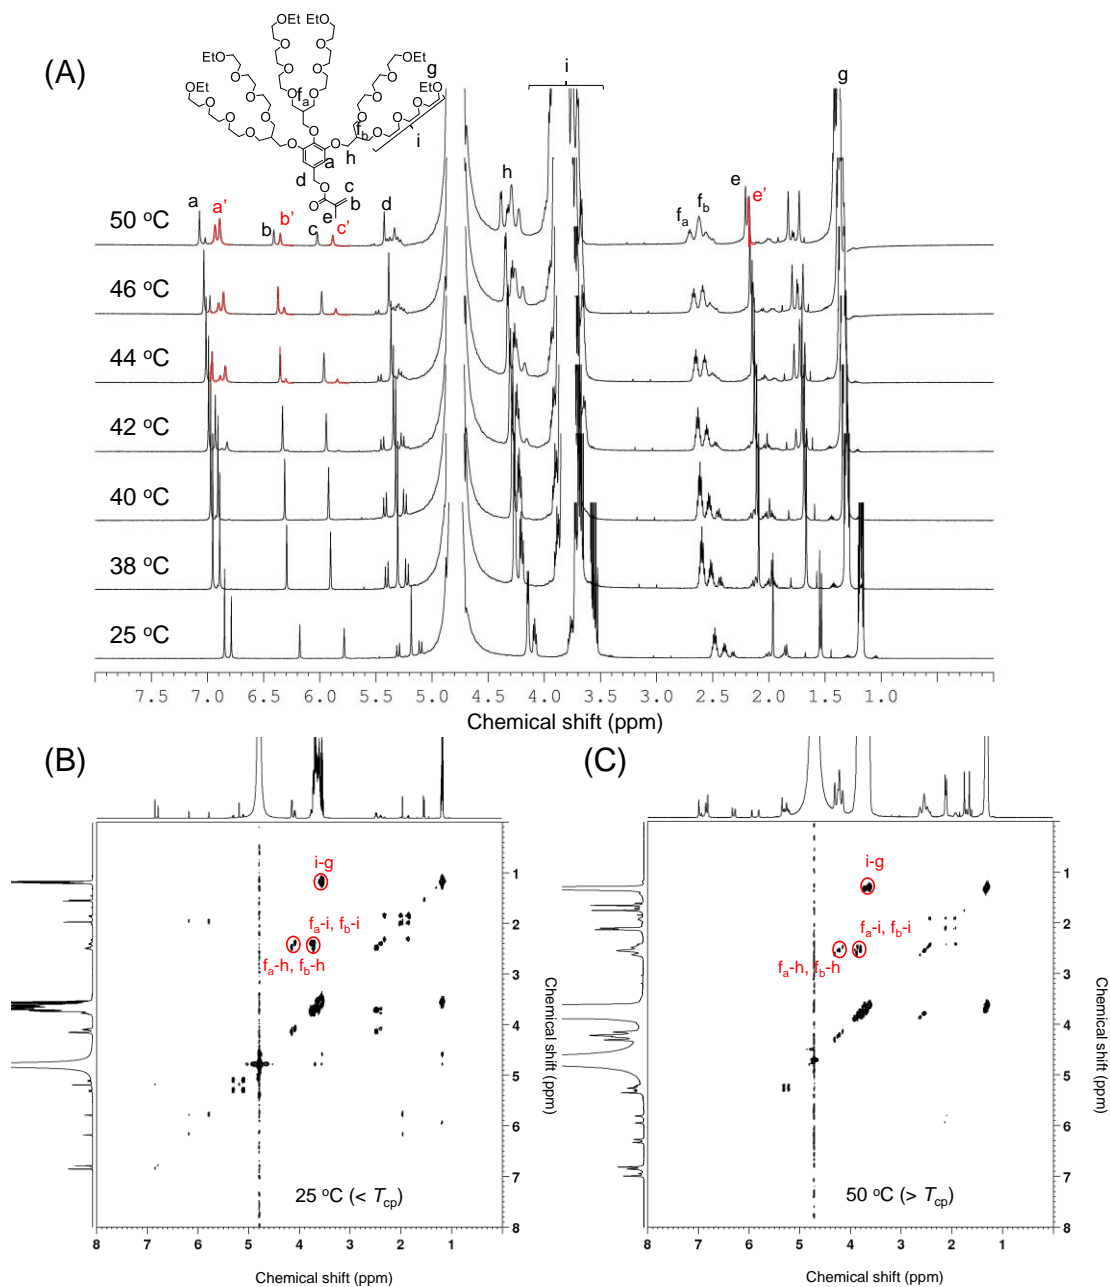

**Fig. S3** Thermally-induced aggregation monitored with NMR spectroscopy in  $\text{D}_2\text{O}$ : Temperature-varied  $^1\text{H}$  NMR spectra of  $\text{Et}^6\text{-M}$  (A);  $^1\text{H}$ - $^1\text{H}$  COSY spectra of  $\text{Et}^6\text{-M}$  at 25 °C (below  $T_{\text{cp}}$ ) (B) and 50 °C (above  $T_{\text{cp}}$ ) (C).  $T_{\text{cp}} = 41.7$  °C. Sample concentration 2.0 wt%.

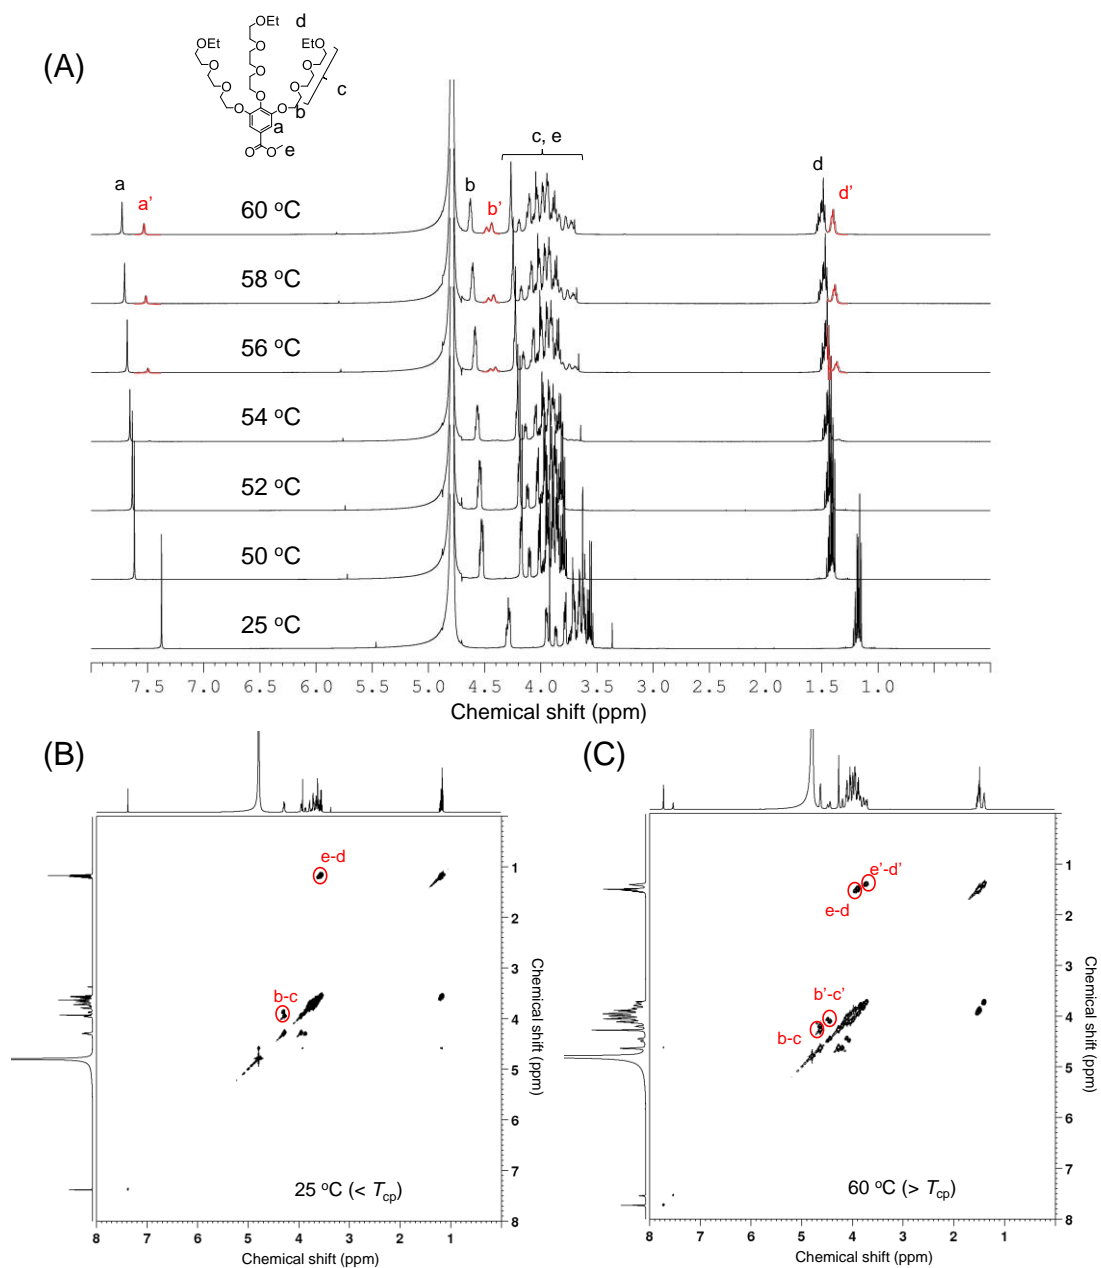

**Fig. S4** Thermally-induced aggregation monitored with NMR spectroscopy in  $D_2O$ : Temperature-varied  $^1H$  NMR spectra of **Et<sup>3</sup>-OMe** (A);  $^1H$ - $^1H$  COSY spectra of **Et<sup>3</sup>-OMe** at 25 °C (below  $T_{cp}$ ) (B) and 60 °C (above  $T_{cp}$ ) (C).  $T_{cp}$  = 55.8 °C. Sample concentration = 2.0 wt%.

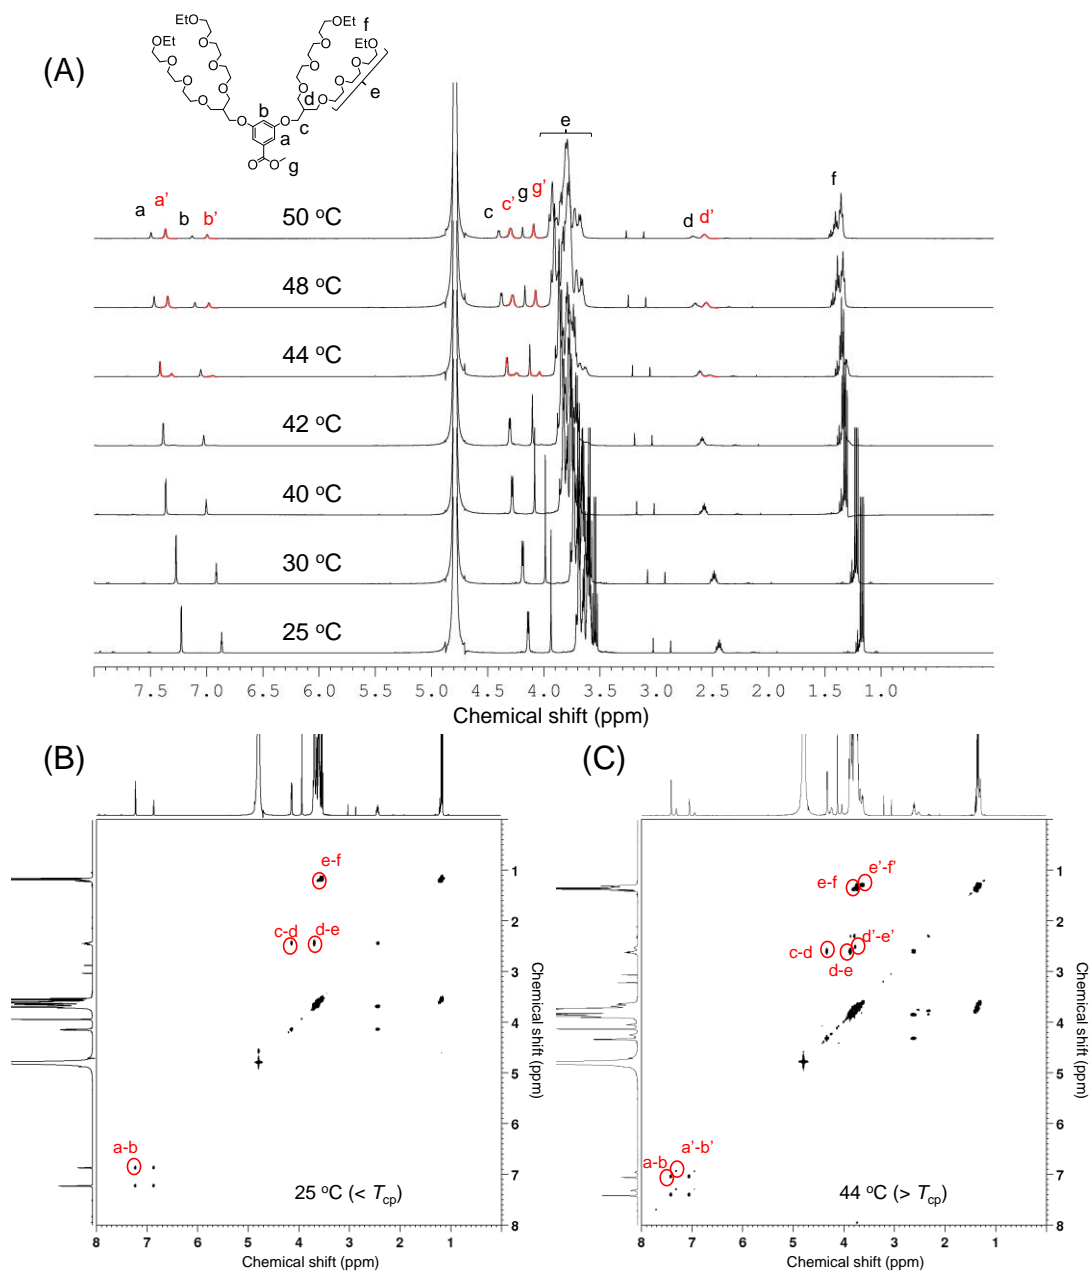

**Fig. S5** Thermally-induced aggregation monitored with NMR spectroscopy in  $D_2O$ : Temperature-varied  $^1H$  NMR spectra of **Et<sup>4</sup>-OMe** (A);  $^1H$ - $^1H$  COSY spectra of **Et<sup>4</sup>-OMe** at 25 °C (below  $T_{cp}$ ) (B) and 44 °C (above  $T_{cp}$ ) (C).  $T_{cp} = 41.9$  °C. Sample concentration 2.0 wt%.

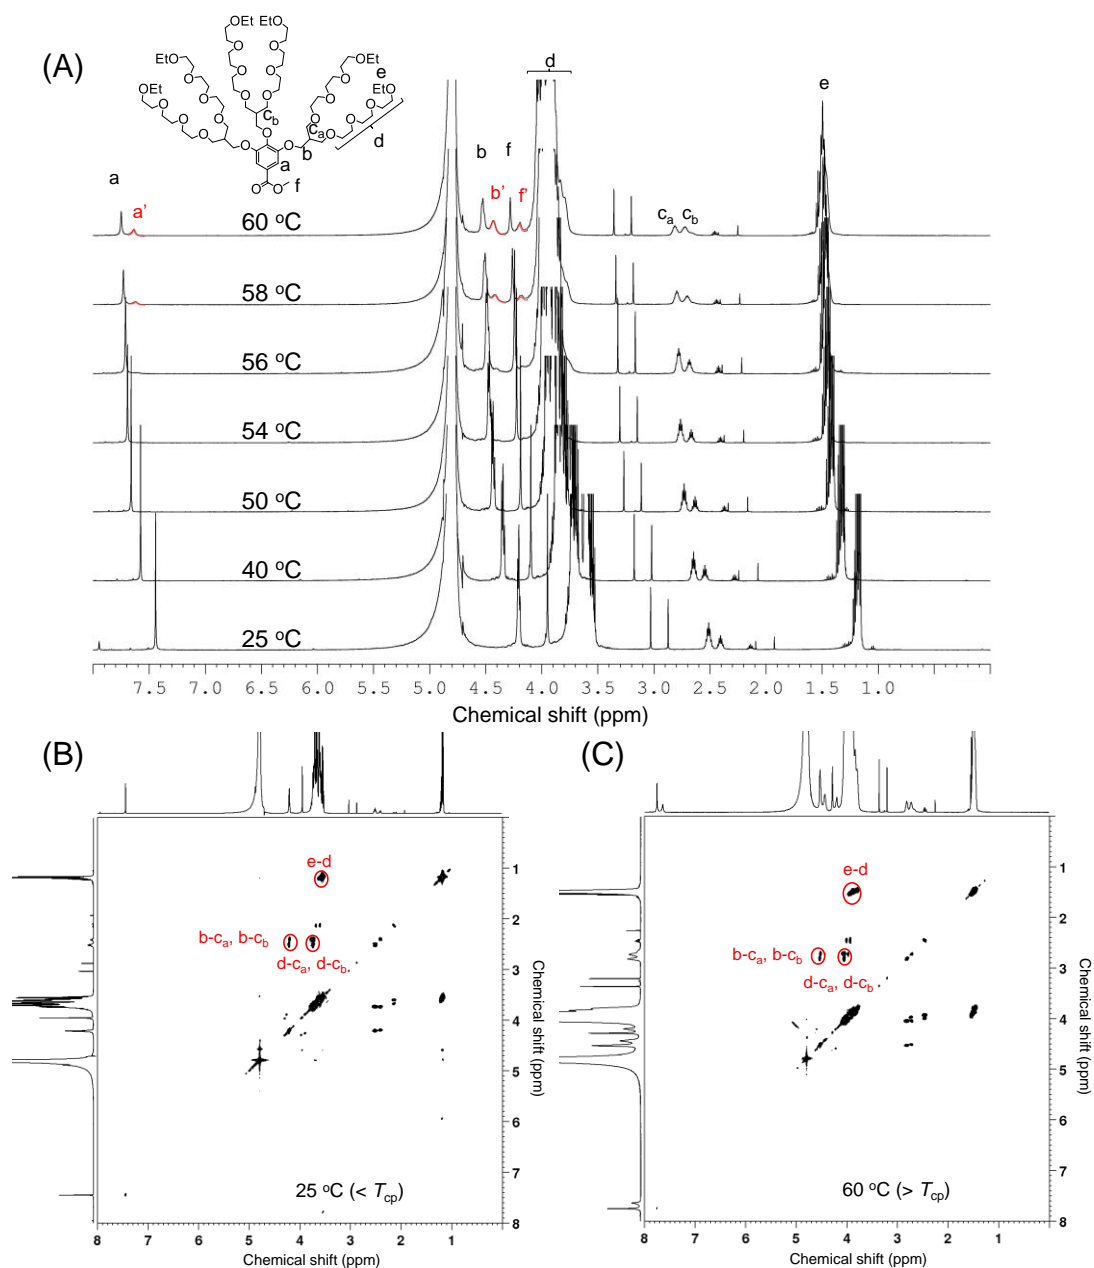

**Fig. S6** Thermally-induced aggregation monitored with NMR spectroscopy in  $D_2O$ : Temperature-varied  $^1H$  NMR spectra of **Et<sup>6</sup>-OMe** (A);  $^1H$ - $^1H$  COSY spectra of **Et<sup>6</sup>-OMe** at 25 °C (below  $T_{cp}$ ) (B) and 60 °C (above  $T_{cp}$ ) (C).  $T_{cp} = 53.8$  °C. Sample concentration 2.0 wt%.

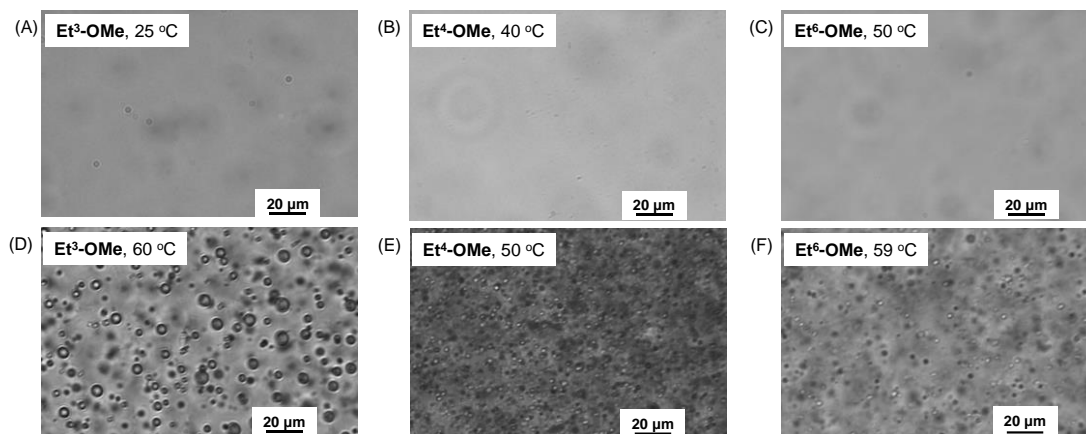

**Fig. S7** Optical photographs of aqueous solutions of the dendritic esters below (A-C) and above (D-F) their  $T_{cp}$ s. All images have the same scale bar of 20  $\mu\text{m}$ . Sample concentration 2.0 wt%. A few air bubbles were appeared in the micrographs A and C below their  $T_{cp}$ s.

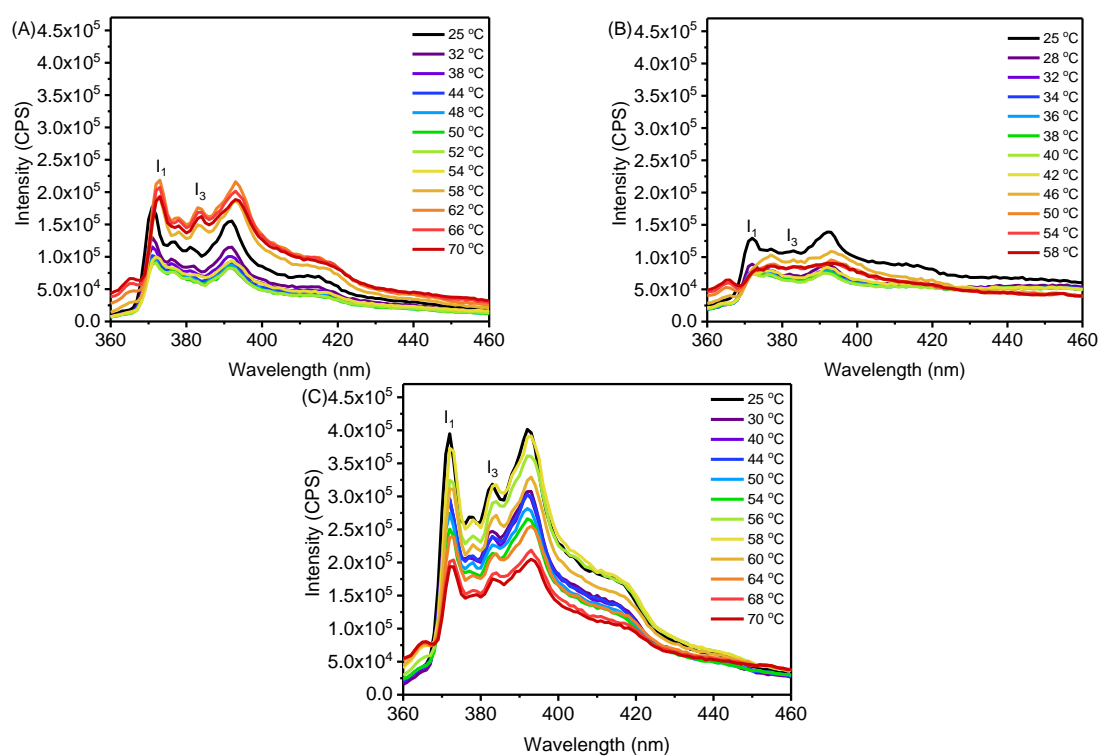

**Fig. S8** Emission spectra of pyrene aqueous solutions ( $1 \times 10^{-6}$  M) in the presence of dendritic macromonomers (0.25 wt%) **Et<sup>3</sup>-M** (A), **Et<sup>4</sup>-M** (B), and **Et<sup>6</sup>-M** (C) at different temperatures.  $\lambda_{ex} = 333$  nm.
